# Supplementary material for: Optimized Extraction of Total Triterpenoids from Jujube (Ziziphus jujuba Mill.) and Comprehensive Analysis of Triterpenic Acids in Different Cultivars
Source: PubMed Central journal article supplement (PMC7238538; doi:10.3390/plants9040412), 2020-03-27
Supplement: plants-09-00412-s001.pdf [file plants-09-00412-s001.pdf]

# Supplementary material

## Optimized extraction of total triterpenoids from jujube (*Ziziphus jujuba* Mill.) and comprehensive analysis of triterpenic acids in different cultivars

Lijun Song <sup>1</sup>, Li Zhang <sup>2</sup>, Long Xu <sup>1</sup>, Yunjian Ma <sup>1</sup>, Weishuai Lian <sup>1</sup>, Yongguo Liu <sup>3</sup>, Yonghua Wang <sup>1\*</sup>

<sup>1</sup> School of Food Science and Engineering, South China University of Technology, Guangzhou, Guangdong 510641, PR China; slj176@163.com (L.S.); xulong19891026@163.com (L.X.); 605740779@qq.com (Y.M.); lianws\_scut@163.com (W.L.); yonghw@scut.edu.cn (Y.W.).

<sup>2</sup> College of Life Science, Tarim University, Alar, Xinjiang, 843300, PR China; cxbh1984@163.com (L.Z.).

<sup>3</sup> Beijing Advanced Innovation Centre for Food Nutrition and Human Health, Beijing Key Laboratory of Flavor Chemistry, Beijing Technology and Business University, Beijing 100048, China; liuyg@th.btbu.edu.cn (L.G.).

\* Correspondence: yonghw@scut.edu.cn (Y.W.)

**Table S1** Summary of the information of jujube samples

| No. | Cultivars        | No. | Cultivars            | No. | Cultivars          |
|-----|------------------|-----|----------------------|-----|--------------------|
| C1  | Linyixiaozao     | C34 | Hongshiyihao         | C67 | Dongjinsanhao      |
| C2  | Zhongzaoyihao    | C35 | Lantiandazao         | C68 | Tengzhoutangzao    |
| C3  | Donglingwuhe     | C36 | Fuxiang              | C69 | Junyi              |
| C4  | Sanlengzao       | C37 | Longzao              | C70 | S-182              |
| C5  | Jinsimi          | C38 | Bopizao              | C71 | Zaohuangchangzao   |
| C6  | Goutouzao        | C39 | Shisishi             | C72 | Bayuehong          |
| C7  | Mayabai          | C40 | Jinzaoyihao          | C73 | Lingzao            |
| C8  | Hetaowen         | C41 | Jing39               | C74 | Jiulingwu          |
| C9  | Wanshuyuanling   | C42 | Shandongpingguoerhao | C75 | Dalilinglingzao    |
| C10 | Jiuzhuangwozao   | C43 | Jikangyihao          | C76 | Henanyouxiyihao    |
| C11 | Yuanlingxinyihao | C44 | Junzaobianzhong-1    | C77 | Momoza             |
| C12 | Changjixin       | C45 | Junzaobianzhong-2    | C78 | Xiangfenyuanzao    |
| C13 | Naitouzao        | C46 | Wubaodazao           | C79 | Linyilajiaozao     |
| C14 | Youcuizao        | C47 | Yongchengchanghong   | C80 | Xinzhenglingzao    |
| C15 | Bayangzao        | C48 | Lucui                | C81 | Xinzhenghongsanhao |
| C16 | Zanyuzao         | C49 | Gutouzao             | C82 | Mopanzao           |
| C17 | Banzao           | C50 | Hongdayihao          | C83 | Zaocuiwang         |

|     |                    |     |                 |     |                          |
|-----|--------------------|-----|-----------------|-----|--------------------------|
| C18 | Houtouzao          | C51 | Jinsixiaozao    | C84 | Liuyeuxian               |
| C19 | Fushuai            | C52 | Liuyuehong      | C85 | Shaungren                |
| C20 | Gagazao            | C53 | Shanghaibaipu   | C86 | Huizaobianzhongyih<br>ao |
| C21 | Yashizao           | C54 | Goutouzao-2     | C87 | Xinzhenghongyihao        |
| C22 | Tailihong          | C55 | Zhongyangmuzao  | C88 | Aijinyihao               |
| C23 | Guanyinzao         | C56 | Shiyierwu       | C89 | Wuhezao                  |
| C24 | Junzao             | C57 | Lajiaozao       | C90 | Dalzhizao                |
| C25 | Zhongzaosanhao     | C58 | Chahuzao        | C91 | Pinbazao                 |
| C26 | Ningyanglingzao    | C59 | Binlangzao      | C92 | Dabailing                |
| C27 | Luzaowuhao         | C60 | Jinsiyihao      | C93 | Luzaoqihao               |
| C28 | Luzaosanhao        | C61 | Changzicui      | C94 | Lingbaodazao             |
| C29 | Jing60             | C62 | Baodeyouzao     | C95 | Zanjing                  |
| C30 | Dongjinyihao       | C63 | Hengyangzhenzhu | C96 | Jinsixinsihao            |
| C31 | Hongzhaoshiyuehong | C64 | Xiangfenmuzao   | C97 | Popozao                  |
| C32 | Yongjijidan        | C65 | Shupujianzao    | C98 | Luodihong                |
| C33 | Shyishiqi          | C66 | Changjixin      | C99 | Aiguochanghong           |

**Table S2.** Contents ( $\mu\text{g/g DW}$ ) of triterpenic acids in jujube samples

| No. <sup>a</sup> | Content of triterpenic acids ( $\mu\text{g/g DW}$ ) <sup>b</sup> |                                     |                                     |                                     |                       |                       |                                               |                                     |                                      |                               |                                     |                        |                       |                      |                             |                                            | Total                  |
|------------------|------------------------------------------------------------------|-------------------------------------|-------------------------------------|-------------------------------------|-----------------------|-----------------------|-----------------------------------------------|-------------------------------------|--------------------------------------|-------------------------------|-------------------------------------|------------------------|-----------------------|----------------------|-----------------------------|--------------------------------------------|------------------------|
|                  | Maslinic acid isomer-1 <sup>c</sup>                              | Maslinic acid isomer-2 <sup>c</sup> | Maslinic acid isomer-3 <sup>c</sup> | Maslinic acid isomer-4 <sup>c</sup> | Alphitolic acid       | Maslinic acid         | 2 $\alpha$ -hydroxy ursolic acid <sup>c</sup> | Maslinic acid isomer-5 <sup>c</sup> | Oleanolic acid isomer-1 <sup>d</sup> | Maslinic isome-6 <sup>c</sup> | Maslinic acid isomer-7 <sup>c</sup> | Betulonic acid         | Oleanolic acid        | Ursolic acid         | Betulonic acid <sup>e</sup> | oleanonic acid + ursonic acid <sup>d</sup> |                        |
|                  | C1                                                               | 0.013 $\pm$ 0                       | 0.026 $\pm$ 0.005                   | 61.919 $\pm$ 2.801                  | 13.265 $\pm$ 1.110    | 1243.954 $\pm$ 72.225 | 372.041 $\pm$ 30.887                          | 52.891 $\pm$ 5.228                  | 27.306 $\pm$ 2.011                   | 13.904 $\pm$ 0.594            | 21.273 $\pm$ 1.771                  | 0.893 $\pm$ 0.055      | 1273.537 $\pm$ 77.329 | 267.806 $\pm$ 21.884 | 116.674 $\pm$ 15.224        | 72.111 $\pm$ 11.119                        |                        |
| C2               | 0.027 $\pm$ 0.001                                                | 0.039 $\pm$ 0.001                   | 35.296 $\pm$ 1.352                  | 0.019 $\pm$ 0                       | 1906.380 $\pm$ 91.220 | 194.417 $\pm$ 16.375  | 61.183 $\pm$ 2.014                            | 79.571 $\pm$ 10.221                 | 7.401 $\pm$ 0.653                    | 21.063 $\pm$ 1.235            | 6.769 $\pm$ 0.459                   | 1598.035 $\pm$ 82.357  | 146.65 $\pm$ 12.598   | 94.328 $\pm$ 8.359   | 128.435 $\pm$ 11.358        | 28.377 $\pm$ 1.986                         | 4307.989 $\pm$ 240.189 |
| C3               | 0.006 $\pm$ 0                                                    | 0.020 $\pm$ 0                       | 0.683 $\pm$ 0.002                   | 0.031 $\pm$ 0.001                   | 678.929 $\pm$ 50.237  | 139.819 $\pm$ 10.205  | 42.044 $\pm$ 3.365                            | 45.812 $\pm$ 3.652                  | 7.401 $\pm$ 0.438                    | 28.427 $\pm$ 2.587            | 2.401 $\pm$ 0.165                   | 867.58 $\pm$ 60.824    | 138.237 $\pm$ 10.582  | 40.073 $\pm$ 1.975   | 55.495 $\pm$ 4.658          | 39.839 $\pm$ 2.621                         | 2086.794 $\pm$ 151.312 |
| C4               | 0.009 $\pm$ 0                                                    | 0.036 $\pm$ 0.001                   | 32.920 $\pm$ 2.312                  | 0.021 $\pm$ 0                       | 517.342 $\pm$ 46.270  | 123.775 $\pm$ 11.023  | 154.219 $\pm$ 11.249                          | 116.959 $\pm$ 8.952                 | 7.734 $\pm$ 0.643                    | 100.158 $\pm$ 9.326           | 51.4 $\pm$ 4.284                    | 1377.632 $\pm$ 75.952  | 289.97 $\pm$ 20.536   | 322.753 $\pm$ 24.327 | 100.184 $\pm$ 7.842         | 149.46 $\pm$ 9.985                         | 3344.57 $\pm$ 232.702  |
| C5               | 0.010 $\pm$ 0                                                    | 0.003 $\pm$ 0                       | 12.113 $\pm$ 0.103                  | 0.019 $\pm$ 0                       | 1317.990 $\pm$ 70.356 | 220.664 $\pm$ 18.652  | 108.88 $\pm$ 7.508                            | 67.949 $\pm$ 5.349                  | 7.684 $\pm$ 0.852                    | 29.156 $\pm$ 2.643            | 1.64 $\pm$ 0.095                    | 1487.37 $\pm$ 85.687   | 248.479 $\pm$ 19.853  | 144.044 $\pm$ 8.689  | 71.45 $\pm$ 5.692           | 47.353 $\pm$ 3.129                         | 3761.524 $\pm$ 228.608 |
| C6               | 0.006 $\pm$ 0                                                    | 0.035 $\pm$ 0.001                   | 37.630 $\pm$ 1.450                  | 0.049 $\pm$ 0.001                   | 407.846 $\pm$ 35.571  | 132.548 $\pm$ 10.250  | 49.561 $\pm$ 3.592                            | 25.524 $\pm$ 2.038                  | 8.123 $\pm$ 0.670                    | 37.964 $\pm$ 2.958            | 1.394 $\pm$ 0.095                   | 523.329 $\pm$ 40.386   | 140.741 $\pm$ 10.358  | 53.625 $\pm$ 4.627   | 24.012 $\pm$ 1.956          | 31.481 $\pm$ 2.353                         | 1473.867 $\pm$ 116.306 |
| C7               | 0.027 $\pm$ 0                                                    | 0.055 $\pm$ 0.002                   | 11.696 $\pm$ 0.484                  | 0.654 $\pm$ 0.002                   | 1624.611 $\pm$ 90.791 | 505.247 $\pm$ 32.432  | 54.997 $\pm$ 4.925                            | 41.091 $\pm$ 3.267                  | 9.034 $\pm$ 0.753                    | 49.636 $\pm$ 3.651            | 2.917 $\pm$ 0.185                   | 2111.78 $\pm$ 123.650  | 431.107 $\pm$ 26.523  | 112.026 $\pm$ 10.352 | 138.886 $\pm$ 9.637         | 90.043 $\pm$ 8.531                         | 5183.807 $\pm$ 315.185 |
| C8               | 0.019 $\pm$ 0.001                                                | 0.768 $\pm$ 0.001                   | 3.774 $\pm$ 0.035                   | 0.022 $\pm$ 0                       | 947.265 $\pm$ 57.068  | 188.245 $\pm$ 9.683   | 50.021 $\pm$ 4.327                            | 111.555 $\pm$ 9.278                 | 6.468 $\pm$ 0.428                    | 45.965 $\pm$ 3.841            | 10.007 $\pm$ 0.867                  | 1494.262 $\pm$ 98.362  | 173.862 $\pm$ 10.324  | 57.093 $\pm$ 4.267   | 108.964 $\pm$ 7.395         | 26.611 $\pm$ 1.954                         | 3214.901 $\pm$ 207.831 |
| C9               | 0.032 $\pm$ 0                                                    | 0.885 $\pm$ 0.001                   | 55.580 $\pm$ 4.582                  | 2.547 $\pm$ 0.034                   | 1598.141 $\pm$ 83.650 | 342.180 $\pm$ 15.734  | 100.126 $\pm$ 9.624                           | 189.213 $\pm$ 20.374                | 8.778 $\pm$ 0.722                    | 100.641 $\pm$ 8.330           | 14.315 $\pm$ 0.998                  | 1726.954 $\pm$ 100.350 | 223.094 $\pm$ 18.667  | 134.395 $\pm$ 8.352  | 75.371 $\pm$ 5.325          | 39.478 $\pm$ 2.455                         | 4611.73 $\pm$ 279.198  |

|     |               |         |           |           |            |           |           |           |              |              |           |            |           |           |           |          |              |
|-----|---------------|---------|-----------|-----------|------------|-----------|-----------|-----------|--------------|--------------|-----------|------------|-----------|-----------|-----------|----------|--------------|
| C10 | 0.028 ± 0     | 0.058 ± | 0.019 ± 0 | 0.008 ± 0 | 663.073 ±  | 156.307 ± | 101.797 ± | 135.849 ± | 6.468 ±      | 60.998 ±     | 0.006 ± 0 | 1249.146 ± | 127.446 ± | 51.062 ±  | 73.966 ±  | 20.374 ± | 2646.605 ±   |
|     |               | 0.001   |           |           | 40.421     | 8.568     | 9.378     | 10.841    | 0.513        | 5.220        |           | 90.314     | 8.752     | 3.241     | 0.327     | 1.780    | 179.356      |
| C11 | 0.020 ± 0.000 | 0.500 ± | 44.986 ±  | 0.650 ±   | 1310.665 ± | 248.806 ± | 90.474 ±  | 123.526 ± | 8.64 ± 0.133 | 65.669 ±     | 7.872 ±   | 1441.498 ± | 205.412 ± | 138.007 ± | 60.793 ±  | 30.398 ± | 3777.916 ±   |
|     |               | 0.005   | 1.357     | 0.005     | 85.432     | 11.023    | 6.374     | 8.267     |              | 3.240        | 0.435     | 100.000    | 18.645    | 10.527    | 4.325     | 1.638    | 251.406      |
| C12 | 0.031 ± 0.001 | 7.043 ± | 0.014 ± 0 | 0.016 ± 0 | 1230.471 ± | 210.294 ± | 20.022 ±  | 113.43 ±  | 6.912 ±      | 57.946 ±     | 10.007 ±  | 1529.732 ± | 172.246 ± | 56.79 ±   | 118.721 ± | 31.22 ±  | 3534.898 ±   |
|     |               | 0.800   |           |           | 65.280     | 9.038     | 1.052     | 9.248     | 0.524        | 4.287        | 0.740     | 101.340    | 10.327    | 3.278     | 7.550     | 1.421    | 214.886      |
| C13 | 0.023 ± 0.001 | 0.946 ± | 51.325 ±  | 7.733 ±   | 723.453 ±  | 218.600 ± | 50.472 ±  | 116.628 ± | 14.526 ±     | 67.067 ±     | 22.166 ±  | 2217.58 ±  | 397.386 ± | 165.959 ± | 110.624 ± | 51.807 ± | 4216.296 ±   |
|     |               | 0.002   | 3.358     | 0.597     | 15.681     | 8.358     | 4.217     | 7.358     | 0.952        | 4.225        | 1.020     | 198.140    | 30.511    | 11.250    | 8.313     | 1.225    | 295.208      |
| C14 | 0.007 ± 0     | 0.040 ± | 190.344 ± | ND        | 619.848 ±  | 612.932 ± | 397.206 ± | 3.457 ±   | 6.907 ±      | 17.1 ± 1.032 | 12.354 ±  | 1005.768 ± | 477.962 ± | 442.69 ±  | 9.417 ±   | 19.425 ± | 3815.457 ±   |
|     |               | 0.002   | 7.324     |           | 13.217     | 12.138    | 15.250    | 0.244     | 0.421        |              | 0.955     | 88.320     | 30.142    | 30.240    | 0.720     | 1.203    | 201.208      |
| C15 | 0.020 ± 0     | 7.509 ± | 166.072 ± | 0.047 ±   | 890.561 ±  | 320.231 ± | 438.165 ± | 57.519 ±  | 7.901 ±      | 41.575 ±     | 104.537 ± | 1894.021 ± | 395.281 ± | 685.325 ± | 23.395 ±  | 85.684 ± | 5117.841 ±   |
|     |               | 0.431   | 6.873     | 0.001     | 18.365     | 10.753    | 20.523    | 3.265     | 0.352        | 3.521        | 8.623     | 162.340    | 25.355    | 50.452    | 1.882     | 7.263    | 319.999      |
| C16 | 0.019 ± 0     | 0.046 ± | 5.606 ±   | 1.729 ±   | 1306.183   | 147.026 ± | 13.219 ±  | 115.173 ± | 9.445 ±      | 41.738 ±     | 10.045 ±  | 1926.475 ± | 162.972 ± | 23.68 ±   | 146.184 ± | 35.08 ±  | 3934.619 ±   |
|     |               | 0.002   | 0.658     | 0.023     | ± 95.960   | 5.651     | 0.853     | 9.647     | 0.842        | 2.531        | 0.753     | 100.622    | 10.350    | 1.855     | 9.840     | 2.752    | 242.339      |
| C17 | 0.020 ± 0     | 0.050 ± | 0.015 ±   | 19.939 ±  | 1592.459 ± | 482.818 ± | 20.02 ±   | 39.814 ±  | 11.5 ± 0.741 | 46.754 ±     | 10.005 ±  | 2136.437 ± | 267.845 ± | 5.267 ±   | 88.466 ±  | 38.712 ± | 4730.12 ±    |
|     |               | 0.002   | 0.001     | 0.681     | 87.657     | 18.354    | 1.420     | 2.482     |              | 1.589        | 0.648     | 99.780     | 19.743    | 0.481     | 6.948     | 2.135    | 242.662      |
| C18 | 0.020 ± 0.001 | 2.387 ± | 67.864 ±  | 3.973 ±   | 561.720 ±  | 214.872 ± | 53.869 ±  | 261.25 ±  | 9.295 ±      | 174.037 ±    | 51.528 ±  | 2035.213 ± | 264.218 ± | 143.639 ± | 94.697 ±  | 42.077 ± | 3980.66 ±    |
|     |               | 0.037   | 4.545     | 0.231     | 14.421     | 11.329    | 2.864     | 19.852    | 0.167        | 16.834       | 3.689     | 180.924    | 24.368    | 10.622    | 4.688     | 3.269    | 297.841      |
| C19 | 0.005 ± 0     | 0.045 ± | 0.005 ± 0 | ND        | 284.729 ±  | 25.108 ±  | 20.01 ±   | 82.787 ±  | 6.618 ±      | 31.781 ±     | 10.005 ±  | 516.409 ±  | 39.639 ±  | 53.17 ±   | 30.171 ±  | 12.294 ± | 1082.775 ±   |
|     |               | 0.001   |           |           | 12.468     | 1.357     | 1.302     | 6.324     | 0.325        | 2.568        | 0.586     | 26.950     | 3.800     | 4.680     | 2.220     | 0.850    | 63.431       |
| C20 | 0.030 ± 0.001 | 0.747 ± | 104.284 ± | 0.040 ±   | 722.378 ±  | 253.744 ± | 70.116 ±  | 29.11 ±   | 7.451 ±      | 30.671 ±     | 3.141 ±   | 1583.879 ± | 307.147 ± | 254.53 ±  | 20.102 ±  | 15.432 ± | 3402.801 ±   |
|     |               | 0.035   | 8.632     | 0.001     | 40.453     | 13.526    | 4.250     | 1.955     | 0.620        | 1.962        | 0.214     | 99.581     | 27.624    | 18.220    | 1.955     | 1.025    | 220.054      |
| C21 | ND            | 0.882 ± | 54.698 ±  | 0.030 ±   | 957.578 ±  | 303.110 ± | 90.731 ±  | 76.017 ±  | 7.412 ±      | 54.865 ±     | 36.292 ±  | 2098.668 ± | 387.223 ± | 256.108 ± | 25.545 ±  | 37.646 ± | 4386.803 ±   |
|     |               | 0.037   | 4.684     | 0.001     | 67.358     | 24.021    | 6.352     | 5.955     | 0.524        | 3.261        | 2.980     | 132.050    | 26.352    | 18.650    | 2.050     | 2.522    | 296.777      |
| C22 | 0.010 ± 0     | 0.039 ± | 0.015 ± 0 | 0.185 ±   | 337.435 ±  | 121.936 ± | 20.01 ±   | 53.766 ±  | 7.873 ±      | 78.308 ±     | 0.005 ± 0 | 1011.833 ± | 265.806 ± | 151.393 ± | 100.367 ± | 82.946 ± | 2211.926 ± 1 |

|     |               |           |           |           |            |           |              |           |          |           |           |            |           |           |           |           |            |
|-----|---------------|-----------|-----------|-----------|------------|-----------|--------------|-----------|----------|-----------|-----------|------------|-----------|-----------|-----------|-----------|------------|
|     |               | 0.001     |           | 0.002     | 21.274     | 9.064     | 1.362        | 6.344     | 0.512    | 5.322     |           | 80.320     | 18.623    | 10.321    | 8.200     | 5.325     | 66.67      |
| C23 | 0.020 ± 0     | 0.030 ± 0 | 121.989 ± | 0.040 ±   | 1554.385 ± | 674.190 ± | 176.517 ±    | 21.106 ±  | 7.662 ±  | 35.445 ±  | 11.412 ±  | 1987.503 ± | 456.953 ± | 336.667 ± | 18.753 ±  | 15.448 ±  | 5418.119 ± |
|     |               |           | 8.642     | 0.002     | 96.067     | 46.521    | 10.550       | 1.842     | 0.600    | 2.662     | 0.950     | 150.320    | 30.250    | 23.120    | 1.232     | 1.203     | 373.961    |
| C24 | 0.030 ± 0.001 | 1.138 ±   | 5.652 ±   | 15.565 ±  | 3282.203 ± | 574.655 ± | 19.608 ±     | 194.09 ±  | 32.359 ± | 78.568 ±  | 2.387 ±   | 2056.994 ± | 300.832 ± | 29.788 ±  | 201.102 ± | 49.625 ±  | 6934.595 ± |
|     |               | 0.009     | 0.067     | 0.557     | 100.278    | 42.147    | 1.025        | 12.300    | 1.652    | 5.300     | 0.165     | 162.300    | 16.952    | 1.865     | 18.230    | 3.562     | 366.41     |
| C25 | ND            | 0.025 ±   | 59.034 ±  | 0.010 ± 0 | 1981.281 ± | 729.938 ± | 108.621 ±    | 27.527 ±  | 6.468 ±  | 60.372 ±  | 1.412 ±   | 1919.628 ± | 592.72 ±  | 168.517 ± | 144.018 ± | 144.751 ± | 5944.32 ±  |
|     |               | 0.001     | 0.485     |           | 75.658     | 50.847    | 9.627        | 2.031     | 0.538    | 4.327     | 0.102     | 150.348    | 41.850    | 10.584    | 10.000    | 9.581     | 365.979    |
| C26 | 0.025 ± 0     | 4.322 ±   | 0.020 ± 0 | 7.904 ±   | 905.701 ±  | 179.494 ± | 0.015 ± 0    | 193.873 ± | 11.589 ± | 115.65 ±  | 0.005 ± 0 | 3021.041 ± | 306.569 ± | 51.077 ±  | 159.945 ± | 37.94 ±   | 4995.17 ±  |
|     |               | 0.147     |           | 0.480     | 80.084     | 12.251    |              | 12.560    | 1.075    | 9.375     |           | 200.242    | 27.310    | 4.235     | 12.842    | 2.534     | 363.135    |
| C27 | 0.002 ± 0     | 0.060 ±   | 0.015 ± 0 | 0.015 ±   | 1788.048 ± | 271.449 ± | 0.015 ±      | 104.718 ± | 6.518 ±  | 30.405 ±  | 0.005 ± 0 | 1657.84 ±  | 160.145 ± | 51.746 ±  | 101.894 ± | 23.656 ±  | 4196.531 ± |
|     |               | 0.005     |           | 0.001     | 97.657     | 14.481    | 0.001        | 7.562     | 0.620    | 1.530     |           | 99.356     | 10.578    | 3.124     | 7.625     | 1.350     | 243.89     |
| C28 | 0.030 ± 0.001 | 3.585 ±   | 0.025 ±   | 0.030 ±   | 969.609 ±  | 167.595 ± | 0.02 ± 0.001 | 99.073 ±  | 6.468 ±  | 31.575 ±  | 0.005 ± 0 | 2008.362 ± | 137.776 ± | 50.151 ±  | 42.561 ±  | 14.271 ±  | 3531.135 ± |
|     |               | 0.127     | 0.001     | 0.002     | 90.574     | 10.432    |              | 7.357     | 0.430    | 2.220     |           | 120.368    | 10.248    | 3.625     | 3.165     | 1.320     | 249.871    |
| C29 | 0.015 ± 0.001 | 7.182 ±   | 8.505 ±   | 7.306 ±   | 1189.846 ± | 309.591 ± | 61.788 ±     | 112.968 ± | 15.109 ± | 58.237 ±  | 4.919 ±   | 1925.764 ± | 202.513 ± | 105.265 ± | 97.129 ±  | 31.281 ±  | 4137.421 ± |
|     |               | 0.653     | 0.713     | 0.625     | 94.418     | 20.546    | 4.369        | 10.262    | 1.048    | 4.832     | 0.251     | 142.362    | 19.280    | 9.649     | 7.752     | 2.163     | 318.924    |
| C30 | 0.023 ± 0.001 | 0.941 ±   | 51.165 ±  | 7.716 ±   | 718.219 ±  | 217.672 ± | 50.55 ±      | 116.282 ± | 14.55 ±  | 67.128 ±  | 22.169 ±  | 2217.339 ± | 398.482 ± | 166.109 ± | 110.669 ± | 52.115 ±  | 4211.129 ± |
|     |               | 0.021     | 3.426     | 0.537     | 35.542     | 12.359    | 4.025        | 8.361     | 1.038    | 4.589     | 1.953     | 176.340    | 28.634    | 12.366    | 9.628     | 4.325     | 303.145    |
| C31 | 0.025 ± 0     | 3.216 ±   | 116.169 ± | 1.981 ±   | 1114.743 ± | 318.502 ± | 152.551 ±    | 552.254 ± | 7.046 ±  | 419.532 ± | 108.137 ± | 3001.359 ± | 582.735 ± | 406.583 ± | 124.475 ± | 102.1 ±   | 7011.406 ± |
|     |               | 0.084     | 8.954     | 0.025     | 87.578     | 27.230    | 12.300       | 46.320    | 0.452    | 30.247    | 9.350     | 200.310    | 49.652    | 26.970    | 10.958    | 9.625     | 520.055    |
| C32 | 0.025 ± 0     | 2.351 ±   | 0.015 ± 0 | 0.020 ± 0 | 1086.846 ± | 123.999 ± | 0.015 ±      | 256.134 ± | 6.468 ±  | 179.583 ± | 0.01 ± 0  | 1703.402 ± | 167.176 ± | 107.79 ±  | 204.223 ± | 35.968 ±  | 3874.026 ± |
|     |               | 0.018     |           |           | 80.157     | 8.358     | 0.001        | 20.348    | 0.560    | 16.327    |           | 142.387    | 13.621    | 9.628     | 19.637    | 2.480     | 313.522    |
| C33 | 0.010 ± 0     | 0.045 ± 0 | 16.388 ±  | 0.015 ± 0 | 671.871 ±  | 168.957 ± | 134.607 ±    | 111.378 ± | 7.734 ±  | 90.642 ±  | 28.327 ±  | 1141.408 ± | 210.793 ± | 142.241 ± | 50.591 ±  | 39.323 ±  | 2814.329 ± |
|     |               |           | 0.103     |           | 15.035     | 9.148     | 10.584       | 10.275    | 0.380    | 7.600     | 2.231     | 97.652     | 19.357    | 11.284    | 4.169     | 2.853     | 190.671    |
| C34 | 0.035 ± 0.001 | 0.885 ±   | 0.045 ±   | 0.015 ± 0 | 1232.545 ± | 298.360 ± | 1.373 ±      | 168.324 ± | 6.468 ±  | 78.287 ±  | 0.015 ±   | 1634.071 ± | 231.019 ± | 11.538 ±  | 143.007 ± | 34.691 ±  | 3840.68 ±  |
|     |               | 0.008     | 0.001     |           | 94.513     | 10.249    | 0.083        | 12.274    | 0.321    | 5.948     | 0.001     | 142.950    | 20.510    | 1.087     | 10.598    | 2.649     | 301.193    |

|     |               |           |           |           |            |           |              |           |              |          |              |            |           |           |           |          |            |
|-----|---------------|-----------|-----------|-----------|------------|-----------|--------------|-----------|--------------|----------|--------------|------------|-----------|-----------|-----------|----------|------------|
| C35 | 0.020 ± 0.001 | 0.030 ±   | 87.732 ±  | 0.020 ±   | 968.389 ±  | 299.374 ± | 45.602 ±     | 30.65 ±   | 6.468 ±      | 19.604 ± | 1.241 ±      | 1303.82 ±  | 262.385 ± | 156.887 ± | 38.706 ±  | 21.996 ± | 3242.925 ± |
|     |               | 0.001     | 3.598     | 0.001     | 26.685     | 9.652     | 3.865        | 2.951     | 0.420        | 1.262    | 0.130        | 99.351     | 22.563    | 11.648    | 2.955     | 1.874    | 186.957    |
| C36 | 0.030 ± 0.001 | 0.045 ±   | 39.768 ±  | 0.040 ±   | 1196.082 ± | 121.925 ± | 34.745 ±     | 208.914 ± | 6.79 ± 0.621 | 81.083 ± | 16.837 ±     | 2436.61 ±  | 236.445 ± | 165.968 ± | 119.627 ± | 29.238 ± | 4694.146 ± |
|     |               | 0.001     | 3.534     | 0.001     | 30.533     | 10.674    | 2.959        | 17.485    |              | 6.582    | 1.104        | 177.350    | 18.573    | 14.381    | 10.478    | 2.452    | 296.729    |
| C37 | 0.005 ± 0     | 0.020 ± 0 | 16.132 ±  | 0.045 ±   | 366.940 ±  | 184.435 ± | 178.722 ±    | 29.014 ±  | 8.601 ±      | 35.125 ± | 57.903 ±     | 641.319 ±  | 165.06 ±  | 160.997 ± | 24.506 ±  | 85.473 ± | 1954.297 ± |
|     |               | 0.942     | 0.001     | 26.696    | 12.340     | 12.658    | 2.035        | 0.730     | 2.958        | 4.628    | 43.687       | 12.365     | 10.548    | 1.985     | 7.364     | 138.937  |            |
| C38 | 0.005 ± 0     | 0.015 ±   | 21.091 ±  | 2.166 ±   | 1058.006 ± | 406.359 ± | 117.87 ±     | 5.837 ±   | 9.884 ±      | 9.633 ±  | 0.065 ±      | 1384.841 ± | 288.276 ± | 110.65 ±  | 20.446 ±  | 21.463 ± | 3456.607 ± |
|     |               | 0.001     | 1.890     | 0.128     | 88.245     | 30.261    | 10.274       | 0.453     | 0.805        | 0.830    | 0.005        | 110.340    | 21.330    | 9.658     | 2.006     | 1.995    | 278.221    |
| C39 | 0.005 ± 0     | 0.020 ±   | 8.160 ±   | 0.015 ± 0 | 198.195 ±  | 93.281 ±  | 48.661 ±     | 42.002 ±  | 6.468 ±      | 63.108 ± | 6.435 ±      | 876.316 ±  | 342.895 ± | 158.188 ± | 20.652 ±  | 34.952 ± | 1899.353 ± |
|     |               | 0.001     | 0.607     |           | 16.958     | 8.570     | 3.998        | 3.957     | 0.452        | 5.724    | 0.353        | 68.572     | 29.675    | 12.359    | 1.958     | 2.968    | 156.152    |
| C40 | 0.040 ± 0.002 | 5.482 ±   | 192.091 ± | 2.970 ±   | 1189.071 ± | 352.682 ± | 194.279 ±    | 130.591 ± | 9.534 ±      | 126.03 ± | 36.256 ±     | 4059.643 ± | 837.463 ± | 603.73 ±  | 88.333    | 58.255 ± | 7886.449 ± |
|     |               | 0.452     | 10.278    | 0.240     | 100.201    | 30.358    | 15.627       | 11.524    | 0.857        | 10.658   | 3.251        | 312.600    | 59.625    | 52.344    | ±5.366    | 4.825    | 618.208    |
| C41 | 0.060 ± 0.003 | 10.561 ±  | 81.193 ±  | 1.038 ±   | 2045.516 ± | 407.807 ± | 110.481 ±    | 98.905 ±  | 7.335 ±      | 56.167 ± | 6.033 ±      | 4097.962 ± | 522.112 ± | 289.609 ± | 141.308 ± | 39.362 ± | 7915.451 ± |
|     |               | 0.980     | 5.357     | 0.023     | 105.320    | 34.025    | 9.958        | 8.351     | 0.652        | 4.362    | 0.515        | 265.321    | 42.352    | 20.349    | 10.358    | 2.899    | 510.824    |
| C42 | 0.020 ± 0.001 | 0.040 ±   | 58.867 ±  | 2.814 ±   | 1326.997 ± | 725.651 ± | 72.31 ±      | 20.095 ±  | 12.516 ±     | 30.814 ± | 0.045 ±      | 1804.32 ±  | 490.879 ± | 103.611 ± | 46.426 ±  | 55.461 ± | 4750.867 ± |
|     |               | 0.002     | 4.195     | 0.135     | 90.350     | 60.866    | 5.350        | 1.974     | 1.035        | 2.367    | 0.001        | 98.336     | 32.020    | 8.314     | 3.985     | 4.218    | 313.179    |
| C43 | 0.030 ± 0.001 | 0.747 ±   | 0.010 ±   | 0.025 ±   | 1674.308 ± | 191.411 ± | 0.02 ± 0.001 | 96.362 ±  | 6.468 ±      | 29.355 ± | 0.005 ± 0    | 2987.142 ± | 208.244 ± | 150.032 ± | 153.492 ± | 27.694 ± | 5525.345 ± |
|     |               | 0.030     | 0.001     | 0.001     | 100.310    | 10.561    |              | 7.310     | 0.527        | 2.101    |              | 198.477    | 18.580    | 10.890    | 10.692    | 2.108    | 361.59     |
| C44 | 0.015 ± 0.001 | 0.020 ±   | 29.188 ±  | 0.015 ±   | 1569.667 ± | 267.191 ± | 156.236      | 7.534 ±   | 13.618 ±     | 4.592 ±  | 4.77 ± 0.355 | 1370.879 ± | 212.398 ± | 205.435 ± | 18.586 ±  | 10.694 ± | 3870.839 ± |
|     |               | 0.001     | 2.028     | 0.001     | 120.289    | 20.290    | ± 10.674     | 0.627     | 0.968        | 0.540    |              | 58.352     | 30.589    | 5.628     | 1.035     | 0.364    | 251.742    |
| C45 | 0.010 ± 0     | 0.045 ±   | 0.005 ± 0 | 0.010 ±   | 513.660 ±  | 93.598 ±  | 0.005 ± 0    | 158.886 ± | 6.468 ±      | 90.553 ± | 0.005 ± 0    | 1038.618 ± | 142.69 ±  | 166.66 ±  | 122.681 ± | 30.77 ±  | 2364.664 ± |
|     |               | 0.001     |           | 0.001     | 31.230     | 4.251     |              | 7.537     | 0.528        | 6.359    |              | 67.0       | 8.360     | 10.232    | 6.384     | 1.658    | 143.800    |
| C46 | 0.010 ± 0     | 0.025 ±   | 41.894 ±  | 0.010 ±   | 599.375 ±  | 312.458 ± | 156.34 ±     | 54.305 ±  | 7.462 ±      | 44.821 ± | 21.457 ±     | 870.239 ±  | 302.056 ± | 255.924 ± | 28.178 ±  | 75.646 ± | 2770.2 ±   |
|     |               | 0.001     | 3.135     | 0.001     | 45.267     | 25.191    | 10.320       | 3.266     | 0.652        | 3.694    | 1.870        | 60.210     | 15.623    | 15.678    | 2.684     | 6.523    | 194.115    |
| C47 | 0.015 ± 0.001 | 0.065 ±   | 11.138 ±  | 6.524 ±   | 1091.406 ± | 514.684 ± | 24.759 ±     | 9.996 ±   | 15.609 ±     | 10.928 ± | 0.03 ± 0.001 | 1575.637 ± | 264.846 ± | 46.004 ±  | 22.979 ±  | 20.28 ±  | 3614.9 ±   |

|     |               |               |                 |               |                    |                  |                  |                  |                |                  |                |                    |                  |                  |                  |                 |                    |
|-----|---------------|---------------|-----------------|---------------|--------------------|------------------|------------------|------------------|----------------|------------------|----------------|--------------------|------------------|------------------|------------------|-----------------|--------------------|
|     |               | 0.003         | 1.028           | 0.350         | 90.982             | 33.015           | 1.865            | 0.873            | 1.068          | 0.960            |                | 100.265            | 23.477           | 3.523            | 1.958            | 1.527           | 260.896            |
| C48 | 0.005 ± 0     | 0.015 ± 0     | 83.271 ± 6.528  | ND            | 472.892 ± 35.416   | 314.009 ± 23.660 | 19.252 ± 1.233   | 1.031 ± 0.095    | 6.901 ± 0.433  | 4.169 ± 0.359    | 0.025 ± 0      | 1257.676 ± 99.368  | 384.252 ± 20.457 | 119.373 ± 9.368  | 18.008 ± 0.838   | 30.343 ± 2.695  | 2711.224 ± 200.45  |
| C49 | 0.005 ± 0     | 0.025 ± 0     | 0.020 ± 0       | 0.030 ± 0.001 | 351.764 ± 31.560   | 205.936 ± 10.330 | 0.025 ± 0.001    | 12.447 ± 0.986   | 8.045 ± 0.754  | 20.074 ± 1.865   | 0.01 ± 0       | 869.724 ± 46.892   | 157.002 ± 10.356 | 150.221 ± 13.260 | 31.42 ± 2.356    | 24.151 ± 2.110  | 1830.899 ± 120.47  |
| C50 | 0.020 ± 0.001 | 0.070 ± 0.004 | 45.591 ± 3.256  | 0.025 ± 0.001 | 1491.704 ± 101.035 | 214.709 ± 18.138 | 204.545 ± 19.764 | 151.498 ± 13.230 | 6.968 ± 0.582  | 32.471 ± 3.018   | 26.627 ± 1.856 | 2524.8 ± 100.230   | 288.354 ± 20.351 | 316.547 ± 28.310 | 127.213 ± 11.470 | 70.5 ± 6.890    | 5501.642 ± 328.134 |
| C51 | 0.005 ± 0     | 0.015 ± 0     | 6.147 ± 0.500   | 0.030 ± 0.001 | 565.875 ± 50.000   | 158.186 ± 12.223 | 47.48 ± 3.522    | 17.744 ± 1.203   | 8.284 ± 0.750  | 10.01 ± 0.561    | 0.065 ± 0.003  | 889.761 ± 70.263   | 120.332 ± 9.354  | 58.79 ± 4.367    | 28.099 ± 1.958   | 23.256 ± 1.869  | 1934.079 ± 156.564 |
| C52 | 0.200 ± 0.010 | 0.030 ± 0.002 | 124.252 ± 4.359 | ND            | 313.490 ± 17.560   | 304.070 ± 18.365 | 185.399 ± 11.563 | 29.657 ± 2.355   | 9.884 ± 3.500  | 67.444 ± 4.356   | 37.811 ± 2.560 | 1071.994 ± 78.652  | 419.656 ± 28.353 | 402.265 ± 29.357 | 21.318 ± 1.364   | 98.54 ± 7.648   | 3105.81 ± 209.004  |
| C53 | 0.010 ± 0     | 0.020 ± 0.001 | 0.005 ± 0       | 0.015 ± 0     | 532.009 ± 44.859   | 13.905 ± 1.234   | 50.015 ± 3.862   | 38.658 ± 2.550   | 6.468 ± 0.523  | 2.952 ± 0.195    | 0.01 ± 0       | 547.986 ± 40.360   | 217.398 ± 18.362 | 315.245 ± 25.600 | 38.834 ± 2.577   | 9.834 ± 0.485   | 1773.364 ± 140.608 |
| C54 | 0.010 ± 0.001 | 0.045 ± 0.002 | 17.719 ± 1.213  | 0.045 ± 0.003 | 680.497 ± 48.890   | 324.098 ± 26.883 | 43.798 ± 3.250   | 15.154 ± 1.023   | 8.534 ± 0.652  | 10.323 ± 0.840   | 2.639 ± 0.135  | 2041.117 ± 153.230 | 334.714 ± 27.871 | 119.082 ± 9.658  | 30.548 ± 2.590   | 20.335 ± 1.362  | 3648.66 ± 277.603  |
| C55 | 0.020 ± 0.001 | 3.141 ± 0.120 | 41.635 ± 2.354  | 0.725 ± 0.032 | 1170.604 ± 88.251  | 300.808 ± 22.235 | 230.87 ± 22.478  | 152.359 ± 11.325 | 9.212 ± 0.742  | 120.107 ± 10.250 | 63.801 ± 5.237 | 1879.776 ± 125.398 | 391.771 ± 26.350 | 314.254 ± 28.672 | 79.114 ± 6.386   | 119.082 ± 9.367 | 4877.279 ± 359.798 |
| C56 | 0.020 ± 0.009 | 0.075 ± 0.005 | 0.055 ± 0.004   | 0.005 ± 0     | 1034.801 ± 79.365  | 131.914 ± 9.239  | 0.206 ± 0.009    | 188.615 ± 10.342 | 7.446 ± 0.354  | 90.521 ± 7.366   | 0.01 ± 0       | 1945.935 ± 133.262 | 203.929 ± 18.678 | 56.599 ± 4.689   | 88.905 ± 7.361   | 29.41 ± 2.136   | 3778.445 ± 272.819 |
| C57 | 0.020 ± 0.001 | 0.045 ± 0.002 | 0.035 ± 0.001   | 0.100 ± 0.009 | 573.136 ± 44.300   | 72.926 ± 5.000   | 0.188 ± 0.009    | 162.604 ± 13.302 | 7.051 ± 0.512  | 57.476 ± 4.388   | 0.01 ± 0       | 1408.821 ± 86.350  | 122.709 ± 10.200 | 53.075 ± 4.986   | 80.652 ± 7.958   | 21.918 ± 1.867  | 2560.766 ± 172.885 |
| C58 | 0.030 ± 0.001 | 4.546 ± 0.350 | 81.389 ± 6.568  | 5.791 ± 0.350 | 1594.089 ± 124.540 | 683.959 ± 57.338 | 70.016 ± 5.688   | 29.181 ± 1.987   | 11.422 ± 0.852 | 50.945 ± 4.352   | 0.117 ± 0.010  | 3101.4 ± 253.200   | 576.592 ± 48.362 | 215.01 ± 18.600  | 23.04 ± 1.958    | 25.678 ± 2.165  | 6473.204 ± 520.411 |
| C59 | 0.010 ± 0     | 0.025 ± 0.001 | 41.941 ± 2.791  | 0.010 ± 0     | 599.254 ± 44.384   | 312.956 ± 24.000 | 156.261 ± 12.330 | 54.378 ± 4.627   | 7.451 ± 0.562  | 44.865 ± 3.955   | 21.298 ± 1.847 | 872.745 ± 75.685   | 303.021 ± 24.623 | 255.972 ± 20.300 | 28.46 ± 1.580    | 75.26 ± 4.369   | 2773.907 ± 221.099 |

|     |               |           |           |           |            |           |           |           |              |           |              |            |           |           |           |          |            |
|-----|---------------|-----------|-----------|-----------|------------|-----------|-----------|-----------|--------------|-----------|--------------|------------|-----------|-----------|-----------|----------|------------|
| C60 | 0.015 ± 0     | 2.892 ±   | 0.010 ± 0 | 0.075 ±   | 753.541 ±  | 153.586 ± | 0.025 ±   | 104.86 ±  | 8.462 ±      | 111.616 ± | 0.005 ± 0    | 1868.191 ± | 173.74 ±  | 261.68 ±  | 57.488 ±  | 24.811 ± | 3520.998 ± |
|     |               | 0.154     |           | 0.005     | 66.340     | 13.295    | 0.001     | 9.658     | 0.652        | 10.368    |              | 155.330    | 10.677    | 23.644    | 4.852     | 1.780    | 296.756    |
| C61 | 0.015 ± 0.001 | 0.569 ±   | 0.010 ±   | 1.099 ±   | 640.470 ±  | 198.291 ± | 0.005 ± 0 | 64.477 ±  | 8.584 ±      | 41.653 ±  | 0.005 ± 0    | 1618.572 ± | 191.978 ± | 265.595 ± | 37.768 ±  | 22.09 ±  | 3091.181 ± |
|     |               | 0.040     | 0.001     | 0.650     | 42.340     | 17.250    |           | 5.362     | 0.458        | 2.740     |              | 99.326     | 10.339    | 24.331    | 2.867     | 1.955    | 207.66     |
| C62 | 0.010 ± 0.001 | 0.055 ±   | 22.027 ±  | 0.010 ± 0 | 559.571 ±  | 159.480 ± | 131.929 ± | 37.035 ±  | 6.862 ±      | 36.843 ±  | 7.979 ±      | 1053.623 ± | 291.814 ± | 218.428 ± | 22.907 ±  | 24.612 ± | 2573.185 ± |
|     |               | 0.002     | 2.011     |           | 48.361     | 10.360    | 9.352     | 1.687     | 0.523        | 2.895     | 0.652        | 85.352     | 15.628    | 14.357    | 1.250     | 1.957    | 194.379    |
| C63 | 0.010 ± 0     | 0.055 ±   | 51.119 ±  | 0.020 ±   | 790.132 ±  | 317.759 ± | 85.974 ±  | 32.052 ±  | 6.946 ±      | 28.672 ±  | 34.378 ±     | 1266.501 ± | 295.357 ± | 220.981 ± | 20.047 ±  | 28.943 ± | 3178.946 ± |
|     |               | 0.002     | 4.032     | 0.001     | 45.300     | 17.214    | 5.310     | 2.144     | 0.530        | 2.034     | 2.854        | 84.320     | 15.377    | 18.352    | 1.857     | 2.180    | 201.507    |
| C64 | 0.010 ± 0     | 0.200 ± 0 | 34.940 ±  | 0.015 ±   | 440.901 ±  | 113.377 ± | 53.012 ±  | 40.934 ±  | 6.546 ±      | 19.487 ±  | 5.129 ±      | 1015.209 ± | 150.837 ± | 91.549 ±  | 23.118 ±  | 14.854 ± | 2010.119 ± |
|     |               | 2.523     | 0.001     | 33.250    | 10.033     | 4.820     | 3.265     | 0.567     | 1.560        | 0.421     | 81.366       | 13.624     | 5.688     | 1.958     | 1.687     | 161.083  |            |
| C65 | 0.035 ± 0.001 | 0.829 ±   | 0.030 ±   | 43.762 ±  | 1645.055 ± | 101.933 ± | 0.065 ±   | 271.182 ± | 33.197 ±     | 30.892 ±  | 0.01 ± 0     | 2231.48 ±  | 69.917 ±  | 52.722 ±  | 145.773 ± | 16.642 ± | 4643.524 ± |
|     |               | 0.071     | 0.001     | 3.239     | 120.055    | 9.358     | 0.004     | 20.544    | 2.980        | 2.652     |              | 200.327    | 5.320     | 4.700     | 12.580    | 1.230    | 383.062    |
| C66 | 0.200 ± 0.009 | 0.050 ±   | 2.532 ±   | 27.584 ±  | 1552.197 ± | 320.633 ± | 8.601 ±   | 28.402 ±  | 13.577 ±     | 24.891 ±  | 0.05 ± 0.001 | 2328.933 ± | 296.456 ± | 30.379 ±  | 154.464 ± | 58.227 ± | 4866.976 ± |
|     |               | 0.005     | 0.108     | 1.250     | 122.321    | 25.770    | 0.530     | 1.881     | 1.247        | 1.965     |              | 189.560    | 25.347    | 2.560     | 12.320    | 4.652    | 399.526    |
| C67 | 0.030 ± 0.001 | 0.065 ±   | 69.272 ±  | 0.035 ±   | 1653.831 ± | 599.869 ± | 87.088 ±  | 179.647 ± | 6.724 ±      | 136.621 ± | 20.067 ±     | 2339.085 ± | 590.104 ± | 213.021 ± | 106.259 ± | 95.586 ± | 6097.304 ± |
|     |               | 0.002     | 4.051     | 0.001     | 120.000    | 48.036    | 4.652     | 14.660    | 0.524        | 11.544    | 1.842        | 199.350    | 47.326    | 17.369    | 9.650     | 7.689    | 486.697    |
| C68 | 0.025 ± 0.001 | 0.734 ±   | 104.345 ± | 0.040 ±   | 722.196 ±  | 254.838 ± | 70.277 ±  | 29.132 ±  | 7.18 ± 0.548 | 30.685 ±  | 3.131 ±      | 1583.925 ± | 307.324 ± | 254.52 ±  | 20.124 ±  | 15.316 ± | 3403.79 ±  |
|     |               | 0.035     | 7.630     | 0.001     | 62.363     | 22.345    | 4.357     | 1.953     |              | 2.960     | 0.125        | 124.352    | 27.625    | 21.352    | 1.892     | 1.240    | 166.687    |
| C69 | 0.020 ± 0.001 | 0.030 ±   | 11.896 ±  | 22.265 ±  | 1436.031 ± | 421.410 ± | 25.666 ±  | 48.248 ±  | 16.054 ±     | 21.522 ±  | 0.045 ±      | 1918.073 ± | 218.707 ± | 42.467 ±  | 34.724 ±  | 18.153 ± | 4235.311 ± |
|     |               | 0.001     | 0.957     | 1.358     | 100.560    | 22.068    | 2.135     | 3.945     | 1.240        | 1.855     | 0.001        | 123.550    | 20.354    | 3.560     | 2.663     | 1.253    | 285.51     |
| C70 | 0.100 ± 0.009 | 0.040 ±   | 16.360 ±  | 0.065 ±   | 641.672 ±  | 229.963 ± | 20.142 ±  | 30.732 ±  | 9.339 ±      | 23.144 ±  | 1.17 ± 0.104 | 1218.207 ± | 238.694 ± | 67.54 ±   | 38.24 ±   | 33.836 ± | 2579.143 ± |
|     |               | 0.002     | 0.930     | 0.003     | 55.038     | 20.410    | 1.855     | 2.688     | 0.652        | 1.958     |              | 99.675     | 20.662    | 4.852     | 2.743     | 2.631    | 214.212    |
| C71 | 0.015 ± 0.001 | 0.055 ±   | 0.005 ± 0 | 0.005 ± 0 | 740.535 ±  | 88.425 ±  | 0.005 ± 0 | 144.952 ± | 6.468 ±      | 36.061 ±  | 0.005 ± 0    | 1120.576 ± | 41.966 ±  | 53.501 ±  | 72.633 ±  | 15.52 ±  | 2320.728 ± |
|     |               | 0.002     |           | 60.320    | 7.055      | 12.440    |           | 0.426     | 2.477        | 100.366   |              | 3.557      | 4.200     | 4.531     | 1.241     | 196.616  |            |
| C72 | 0.015 ± 0.001 | 0.277 ±   | 8.512 ±   | 0.030 ±   | 833.479 ±  | 159.093 ± | 11.696 ±  | 203.499 ± | 8.206 ±      | 102.634 ± | 4.400 ±      | 2431.718 ± | 289.731 ± | 61.842 ±  | 69.229 ±  | 29.099 ± | 4213.459 ± |



|     |               |           |           |          |            |           |              |           |              |           |              |            |           |           |           |           |           |
|-----|---------------|-----------|-----------|----------|------------|-----------|--------------|-----------|--------------|-----------|--------------|------------|-----------|-----------|-----------|-----------|-----------|
|     |               | 0.015     | 0.347     | 0.001    | 66.245     | 12.245    | 0.985        | 18.330    | 0.752        | 9.600     | 0.300        | 189.668    | 25.340    | 5.324     | 5.847     | 1.956     | 336.956   |
| C73 | 0.015 ± 0.001 | 0.040 ±   | 27.523 ±  | 0.045 ±  | 420.620 ±  | 110.229 ± | 17.409 ±     | 109.528 ± | 9.956 ±      | 60.749 ±  | 13.112 ±     | 1375.849 ± | 234.501 ± | 94.782 ±  | 45.037 ±  | 21.707 ±  | 2541.103± |
|     |               | 0.002     | 1.900     | 0.002    | 30.038     | 10.500    | 1.274        | 9.367     | 0.590        | 5.332     | 1.102        | 100.241    | 22.387    | 8.670     | 3.600     | 1.871     | 196.877   |
| C74 | 0.005 ± 0     | 0.005 ± 0 | 10.650 ±  | 0.015 ±  | 406.942 ±  | 156.795 ± | 58.341 ±     | 79.948 ±  | 6.99 ± 0.562 | 84.174 ±  | 12.568 ±     | 948.128 ±  | 248.207 ± | 125.517 ± | 32.692 ±  | 51.007 ±  | 2221.985± |
|     |               |           | 0.990     | 0.001    | 30.660     | 10.358    | 4.688        | 6.952     |              | 6.355     | 1.022        | 84.365     | 21.368    | 10.376    | 2.958     | 4.251     | 184.906   |
| C75 | 0.005 ± 0     | 0.030 ±   | 4.934 ±   | 0.075 ±  | 536.957 ±  | 157.574 ± | 32.276 ±     | 43.741 ±  | 8.856 ±      | 48.814 ±  | 1.59 ± 0.120 | 721.789 ±  | 137.476 ± | 33.695 ±  | 21.613 ±  | 23.617 ±  | 1773.042± |
|     |               | 0.001     | 0.300     | 0.003    | 34.162     | 13.365    | 2.957        | 3.958     | 0.968        | 3.600     |              | 53.218     | 11.785    | 2.931     | 1.501     | 1.952     | 130.821   |
| C76 | 0.030 ± 0.001 | 0.055 ±   | 0.023 ±   | 12.783 ± | 1024.762 ± | 385.851 ± | 1.899 ±      | 164.86 ±  | 9.569 ±      | 147.177 ± | 2.516 ±      | 1551.577 ± | 259.313 ± | 51.512 ±  | 60.665 ±  | 22.368 ±  | 3694.96±  |
|     |               | 0.001     | 0.001     | 0.940    | 97.037     | 17.034    | 0.123        | 15.690    | 0.856        | 13.289    | 0.154        | 100.037    | 21.228    | 4.099     | 6.200     | 1.978     | 278.668   |
| C77 | 0.020 ± 0.001 | 0.070 ±   | 0.025 ±   | 0.035 ±  | 1366.128 ± | 151.807 ± | 0.21 ± 0.014 | 90.112 ±  | 6.74 ± 0.547 | 56.494 ±  | 0.005 ± 0    | 1414.707 ± | 108.264 ± | 50.508 ±  | 102.633 ± | 33.514 ±  | 3381.273± |
|     |               | 0.004     | 0.001     | 0.002    | 127.000    | 10.038    |              | 7.528     |              | 4.948     |              | 121.385    | 9.664     | 3.501     | 9.229     | 2.459     | 296.321   |
| C78 | 0.055 ± 0.004 | 12.817 ±  | 250.944 ± | 7.975 ±  | 709.960 ±  | 242.314 ± | 188.747 ±    | 242.684 ± | 7.379 ±      | 157.773 ± | 95.544 ±     | 2739.694 ± | 503.014 ± | 667.38 ±  | 158.668 ± | 146.545 ± | 6141.491± |
|     |               | 1.033     | 21.300    | 0.644    | 55.374     | 21.340    | 16.860       | 22.697    | 0.632        | 13.250    | 7.920        | 222.380    | 34.665    | 48.313    | 12.877    | 12.613    | 491.902   |
| C79 | 0.015 ± 0.001 | 2.458 ±   | 8.374 ±   | 1.177 ±  | 1348.857 ± | 250.965 ± | 98.87 ±      | 192.93 ±  | 9.778 ±      | 81.417 ±  | 18.832 ±     | 1839.496 ± | 227.537 ± | 99.946 ±  | 121.42 ±  | 58.638 ±  | 4360.712± |
|     |               | 0.197     | 0.663     | 0.098    | 126.848    | 26.569    | 8.000        | 15.188    | 0.860        | 6.958     | 1.574        | 156.340    | 20.681    | 7.958     | 10.352    | 4.220     | 386.607   |
| C80 | 0.015 ± 0.001 | 0.025 ±   | 23.517 ±  | 1.611 ±  | 1429.144 ± | 382.322 ± | 41.255 ±     | 90.393 ±  | 8.645 ±      | 45.111 ±  | 2.476 ±      | 1566.491 ± | 225.194 ± | 62.918 ±  | 44.282 ±  | 27.971 ±  | 3951.368± |
|     |               | 0.001     | 1.891     | 0.120    | 122.430    | 34.035    | 3.928        | 8.379     | 0.652        | 2.498     | 0.153        | 135.000    | 19.669    | 4.958     | 3.697     | 1.948     | 339.360   |
| C81 | 0.020 ± 0.001 | 0.035 ±   | 15.094 ±  | 0.030 ±  | 1330.612 ± | 185.271 ± | 15.673 ±     | 186.83 ±  | 6.874 ±      | 77.771 ±  | 13.664 ±     | 1555.417 ± | 181.093 ± | 73.22 ±   | 48.497 ±  | 17.542 ±  | 3707.642± |
|     |               | 0.002     | 1.329     | 0.001    | 111.740    | 14.684    | 1.233        | 14.417    | 0.562        | 4.380     | 0.957        | 108.297    | 17.518    | 5.270     | 3.462     | 1.300     | 285.117   |
| C82 | 0.015 ± 0.001 | 0.045 ±   | 0.020 ± 0 | 11.849 ± | 1830.871 ± | 549.742 ± | 2.088 ±      | 40.561 ±  | 9.001 ±      | 34.243 ±  | 0.01 ± 0.000 | 1378.982 ± | 320.131 ± | 56.46 ±   | 49.869 ±  | 22.951 ±  | 4306.846± |
|     |               | 0.003     |           | 0.950    | 139.870    | 49.773    | 0.135        | 2.620     | 0.752        | 2.621     |              | 121.194    | 28.622    | 4.957     | 3.491     | 1.344     | 356.333   |
| C83 | 0.020 ± 0     | 0.040 ±   | 0.010 ±   | 11.625 ± | 839.082 ±  | 67.988 ±  | 0.035 ±      | 161.433 ± | 14.51 ±      | 14.08 ±   | 0.045 ±      | 1030.204 ± | 36.696 ±  | 51.134 ±  | 54.406 ±  | 11.822 ±  | 2293.13±  |
|     |               | 0.002     | 0.001     | 0.995    | 81.353     | 4.564     | 0.002        | 13.620    | 1.300        | 1.021     | 0.001        | 96.342     | 2.867     | 4.500     | 3.840     | 0.953     | 211.359   |
| C84 | 0.005 ± 0     | 0.015 ±   | 7.001 ±   | 5.798 ±  | 673.980 ±  | 259.197 ± | 6.759 ±      | 11.067 ±  | 10.289 ±     | 18.662 ±  | 0.03 ± 0     | 727.11 ±   | 148.827 ± | 66.575 ±  | 18.358 ±  | 18.281 ±  | 1971.952± |
|     |               | 0.001     | 0.095     | 0.245    | 45.351     | 20.038    | 0.482        | 0.966     | 0.384        | 1.155     |              | 56.460     | 12.697    | 4.680     | 1.327     | 1.050     | 144.901   |

|     |                  |         |           |           |            |           |              |           |              |           |              |            |           |           |          |           |            |
|-----|------------------|---------|-----------|-----------|------------|-----------|--------------|-----------|--------------|-----------|--------------|------------|-----------|-----------|----------|-----------|------------|
| C85 | 0.020 ± 0.001    | 6.695 ± | 33.670 ±  | 22.095 ±  | 1258.489 ± | 368.298 ± | 52.041 ±     | 177.402 ± | 13.327 ±     | 107.578 ± | 19.91 ±      | 1875.927 ± | 350.081 ± | 125.336 ± | 98.223 ± | 35.569 ±  | 4544.662 ± |
|     |                  | 0.455   | 2.332     | 2.039     | 114.580    | 30.806    | 3.733        | 14.890    | 0.953        | 9.687     | 1.380        | 160.890    | 28.600    | 11.956    | 9.313    | 2.822     | 394.437    |
| C86 | 0.030 ±<br>0.001 | 0.192 ± | 0.010 ±   | 3.647 ±   | 2952.324 ± | 751.855 ± | 0.015 ±      | 98.621 ±  | 6.64 ± 0.547 | 45.993 ±  | 0.005 ± 0    | 2195.193 ± | 390.139 ± | 54.568 ±  | 72.15 ±  | 23.206 ±  | 6594.587 ± |
|     |                  | 0.068   | 0.001     | 0.175     | 200.045    | 38.762    | 0.001        | 8.698     |              | 3.130     |              | 168.360    | 29.697    | 4.623     | 3.528    | 1.986     | 459.622    |
| C87 | 0.010 ± 0        | 0.045 ± | 8.978 ±   | 26.370 ±  | 951.651 ±  | 185.463 ± | 3.002 ±      | 102.733 ± | 13.965 ±     | 33.386 ±  | 1.54 ± 0.103 | 1128.473 ± | 130.306 ± | 25.792 ±  | 83.795 ± | 29.91 ±   | 2725.422 ± |
|     |                  | 0.002   | 0.710     | 2.351     | 84.037     | 16.750    | 0.280        | 9.682     | 1.035        | 2.541     |              | 95.362     | 11.240    | 1.852     | 7.623    | 2.130     | 235.668    |
| C88 | 0.020 ± 0.001    | 0.025 ± | 12.401 ±  | 0.015 ±   | 1532.984 ± | 87.810 ±  | 26.851 ±     | 84.84 ±   | 6.907 ±      | 11.113 ±  | 3.002 ±      | 1316.021 ± | 84.29 ±   | 55.142 ±  | 61.931 ± | 15.165 ±  | 3298.516 ± |
|     |                  | 0.001   | 1.020     | 0.001     | 143.000    | 7.026     | 2.362        | 7.658     | 0.560        | 0.945     | 0.210        | 112.643    | 6.304     | 4.952     | 4.382    | 1.243     | 292.308    |
| C89 | 0.010 ± 0.001    | 0.035 ± | 0.030 ±   | 0.010 ±   | 246.188 ±  | 47.348 ±  | 0.03 ± 0.001 | 134.116 ± | 6.563 ±      | 60.721 ±  | 0.005 ± 0    | 712.643 ±  | 75.165 ±  | 125.438 ± | 36.735 ± | 15.115 ±  | 1460.151 ± |
|     |                  | 0.002   | 0.001     | 0.001     | 22.350     | 2.761     |              | 10.414    | 0.307        | 4.021     |              | 58.670     | 5.950     | 10.333    | 3.186    | 1.240     | 119.22     |
| C90 | 0.010 ± 0        | ND      | 0.010 ± 0 | 0.020 ±   | 568.824 ±  | 121.502 ± | 0.005 ± 0    | 125.788 ± | 7.079 ±      | 91.901 ±  | 0.005 ± 0    | 1084.023 ± | 127.185 ± | 158.347 ± | 18.819 ± | 14.41 ±   | 2317.928 ± |
|     |                  |         |           | 0.001     | 51.670     | 10.078    |              | 10.984    | 0.587        | 8.625     |              | 95.675     | 11.895    | 13.151    | 1.275    | 1.110     | 205.651    |
| C91 | 0.150 ± 0.009    | 0.055 ± | 0.030 ±   | 12.788 ±  | 1022.521   | 385.819 ± | 1.974 ±      | 164.592 ± | 9.500 ±      | 147.175 ± | 2.651 ±      | 1556.305 ± | 314.339 ± | 56.55 ±   | 60.665 ± | 22.368 ±  | 3772.333 ± |
|     |                  | 0.003   | 0.001     | 1.009     | ± 89.290   | 2.860     | 0.164        | 14.616    | 0.657        | 11.263    | 0.135        | 130.250    | 28.681    | 4.852     | 5.687    | 1.958     | 291.435    |
| C92 | 0.010 ±<br>0.001 | 0.015 ± | 0.015 ±   | 9.316 ±   | 964.529 ±  | 317.613 ± | 0.02 ± 0     | 7.588 ±   | 8.09 ± 0.250 | 14.126 ±  | ND           | 787.199 ±  | 142.002 ± | 104.568 ± | 53.956 ± | 30.715 ±  | 2439.761 ± |
|     |                  | 0.001   | 0.001     | 0.840     | 89.344     | 24.088    |              | 0.531     |              | 1.152     |              | 56.892     | 12.358    | 8.695     | 4.692    | 2.877     | 177.634    |
| C93 | 0.150 ± 0.011    | 0.025 ± | 11.536 ±  | 0.020 ±   | 1408.593 ± | 183.621 ± | 89.973 ±     | 27.11 ±   | 6.551 ±      | 3.617 ±   | 2.17 ± 0.013 | 1530.582 ± | 160.867 ± | 106.817 ± | 25.117 ± | 13.643 ±  | 3585.243 ± |
|     |                  | 0.002   | 0.996     | 0.001     | 135.000    | 14.035    | 7.358        | 2.342     | 0.053        | 0.023     |              | 126.300    | 14.150    | 9.680     | 2.154    | 1.147     | 313.264    |
| C94 | 0.020 ± 0.001    | 0.020 ± | 0.065 ±   | 0.015 ±   | 1568.906 ± | 95.433 ±  | 0.055 ±      | 33.702 ±  | 6.835 ±      | 6.609 ±   | 0.02 ± 0     | 1012.122 ± | 70.617 ±  | 79.598 ±  | 53.873 ± | 17.414 ±  | 2945.304 ± |
|     |                  | 0.001   | 0.003     | 0.001     | 126.380    | 8.125     | 0.001        | 3.120     | 0.571        | 0.552     |              | 99.320     | 6.124     | 4.598     | 4.315    | 1.540     | 254.652    |
| C95 | 0.015 ± 0.001    | 0.055 ± | 104.156 ± | 0.010 ±   | 464.963 ±  | 290.193 ± | 268.009 ±    | 43.457 ±  | 6.468 ±      | 51.952 ±  | 10.981 ±     | 2055.911 ± | 341.873 ± | 260.78 ±  | 94.991 ± | 107.464 ± | 4101.278 ± |
|     |                  | 0.003   | 9.500     | 0.001     | 36.890     | 21.067    | 23.500       | 3.210     | 0.322        | 3.268     | 0.872        | 156.582    | 28.817    | 21.643    | 8.117    | 9.867     | 323.66     |
| C96 | 0.005 ± 0        | 0.020 ± | 0.060 ±   | 0.005 ± 0 | 357.683 ±  | 90.378 ±  | 28.9 ± 2.230 | 98.937 ±  | 6.851 ±      | 91.068 ±  | 7.687 ±      | 712.565 ±  | 141.88 ±  | 44.033 ±  | 22.318 ± | 21.874 ±  | 1624.265 ± |
|     |                  | 0.001   | 0.003     |           | 28.433     | 7.110     |              | 8.795     | 0.521        | 8.715     | 0.527        | 60.200     | 12.100    | 2.850     | 2.045    | 1.856     | 135.386    |
| C97 | 0.010 ± 0        | 0.035 ± | 41.728 ±  | ND        | 418.913 ±  | 167.940 ± | 54.958 ±     | 15.841 ±  | 7.351 ±      | 32.77 ±   | 0.907 ±      | 1290.803 ± | 350.098 ± | 139.965 ± | 20.052 ± | 30.587 ±  | 2571.956 ± |

|     |           |         |           |         |           |           |              |          |          |          |         |            |           |           |          |          |            |
|-----|-----------|---------|-----------|---------|-----------|-----------|--------------|----------|----------|----------|---------|------------|-----------|-----------|----------|----------|------------|
|     |           | 0.002   | 2.098     |         | 38.079    | 14.260    | 4.851        | 1.247    | 0.594    | 2.495    | 0.008   | 100.303    | 33.200    | 11.596    | 1.573    | 2.594    | 212.900    |
| C98 | 0.010 ± 0 | 0.035 ± | 0.010 ± 0 | 2.376 ± | 1230.706  | 313.355 ± | 0.01 ± 0.001 | 31.358 ± | 10.567 ± | 24.912 ± | ND      | 1606.976 ± | 239.005 ± | 104.568 ± | 87.472 ± | 38.24 ±  | 3689.599 ± |
|     |           | 0.001   |           | 0.180   | ± 100.350 | 25.068    |              | 2.697    | 0.680    | 1.562    |         | 130.240    | 20.341    | 9.653     | 6.850    | 2.412    | 300.035    |
| C99 | 0.005 ± 0 | 0.015 ± | 290.723 ± | 0.020 ± | 298.133 ± | 288.407 ± | 139.509 ±    | 3.806 ±  | 7.029 ±  | 10.771 ± | 0.075 ± | 649.588 ±  | 401.596 ± | 175.869 ± | 19.125 ± | 66.807 ± | 2351.477 ± |
|     |           | 0.001   | 23.560    | 0.001   | 24.030    | 22.160    | 11.852       | 0.240    | 0.489    | 0.846    | 0.005   | 51.320     | 31.588    | 15.550    | 1.432    | 5.880    | 188.953    |

<sup>a</sup> The sample No. is same as Table S1.

<sup>b</sup> Concentrations of the target compounds were calculated from the corresponding standards using external standard method.

<sup>c</sup> Quantified relatively by calibration curves of maslinic acid.

<sup>d</sup> Quantified relatively by calibration curves of oleanolic acid.

<sup>e</sup> Quantified relatively by calibration curves of betulinic acid.

ND: not detected, Datas were showed as means ± SD (n = 3).

**Table S3** Component matrix of principal component analysis

| Variables                         | Component |        |        |        |
|-----------------------------------|-----------|--------|--------|--------|
|                                   | PC1       | PC2    | PC3    | PC4    |
| Maslinic acid isomer-1            | 0.215     | 0.173  | 0.033  | 0.347  |
| Maslinic acid isomer-2            | 0.612     | -0.061 | 0.279  | 0.068  |
| Maslinic acid isomer-3            | 0.648     | -0.452 | -0.270 | 0.178  |
| Maslinic acid isomer-4            | 0.102     | 0.602  | 0.143  | 0.688  |
| Alphitolic acid                   | 0.390     | 0.800  | -0.120 | -0.253 |
| Maslinic acid                     | 0.574     | 0.385  | -0.618 | -0.110 |
| 2 $\alpha$ - hydroxy ursolic acid | 0.595     | -0.524 | -0.295 | 0.135  |
| Maslinic acid isomer-5            | 0.361     | 0.121  | 0.826  | -0.116 |
| Oleanolic acid isomer-1           | 0.118     | 0.611  | 0.081  | 0.634  |
| Maslinic acid isomer-6            | 0.510     | -0.113 | 0.640  | -0.177 |
| Maslinic acid isomer-7            | 0.658     | -0.485 | 0.292  | 0.128  |
| Betulonic acid                    | 0.721     | 0.343  | 0.195  | -0.143 |
| Oleanolic acid                    | 0.831     | -0.105 | -0.308 | -0.053 |
| Ursolic acid                      | 0.687     | -0.580 | -0.087 | 0.120  |
| Betulonic acid                    | 0.392     | 0.476  | 0.566  | -0.151 |
| Oleanonic acid + Ursonic acid     | 0.651     | -0.296 | 0.093  | 0.035  |
| Total triterpenic acids           | 0.412     | 0.720  | -0.121 | -0.237 |
| FRAP                              | 0.524     | 0.417  | -0.616 | -0.092 |
